# Supplementary material
Source: PubMed Central journal article supplement (PMC6944021)
Supplement: ijcep0012-0229-f5.pdf [file ijcep0012-0229-f5.pdf]

## miR-17-5p promotes NPC radioresistance

**Table S1.** The clinical information of the NPC patients involved in this study

| No. | Sex | Stage | Radio sensitivity |
|-----|-----|-------|-------------------|
| 1   | M   | II    | Resistant         |
| 2   | M   | I     | Sensitive         |
| 3   | F   | III   | Resistant         |
| 4   | F   | I     | Resistant         |
| 5   | F   | II    | Sensitive         |
| 6   | M   | I     | Sensitive         |
| 7   | F   | I     | Sensitive         |
| 8   | M   | I     | Resistant         |
| 9   | M   | II    | Resistant         |
| 10  | F   | II    | Sensitive         |
| 11  | M   | III   | Resistant         |
| 12  | M   | I     | Sensitive         |
| 13  | F   | II    | Sensitive         |
| 14  | M   | I     | Sensitive         |
| 15  | M   | III   | Resistant         |
| 16  | M   | II    | Sensitive         |
| 17  | F   | II    | Resistant         |
| 18  | F   | I     | Sensitive         |
| 19  | M   | III   | Resistant         |
| 20  | M   | III   | Resistant         |
| 21  | F   | II    | Sensitive         |
| 22  | M   | I     | Sensitive         |
| 23  | F   | III   | Resistant         |
| 24  | M   | II    | Sensitive         |
| 25  | M   | I     | Resistant         |
| 26  | F   | I     | Sensitive         |
| 27  | F   | II    | Resistant         |
| 28  | M   | III   | Resistant         |
| 29  | F   | I     | Sensitive         |
| 30  | M   | II    | Resistant         |

**Table S2.** Primers and oligonucleotides used in this study

| Name          | Purpose    | Sequence                   | Length |
|---------------|------------|----------------------------|--------|
| miR-17-5p     | RT-PCR     | 5'-CAAAGTGCTTACAGTGCAGGTAG | 89 bp  |
| miR-20a-5p    | RT-PCR     | 5'-TAAAGTGCTTATAGTGCAGGTAG | 71 bp  |
| miR-18a-5p    | RT-PCR     | 5'-TAAGGTGCATCTAGTGCAGATAG | 71 bp  |
| Pten-F*       | RT-PCR     | 5'-TTTGAAGACCATAACCCACCAC  | 134 bp |
| Pten-R*       | RT-PCR     | 5'-ATTACACCAGTTCGTCCCTTTC  | 134 bp |
| Pten 3' UTR-F | Gene clone | 5'-TCAAGAGGGATAAACACCCAT   | 851 bp |
| Pten 3' UTR-R | Gene clone | 5'-TATAATGTTTCAAGCCCAT     | 851 bp |

\*F, forward; R, reverse.
